# Supplementary material
Source: PubMed Central journal article supplement (PMC3306670)
Supplement: 1113009109_pnas.201113009SI.pdf [file 1113009109_pnas.201113009SI.pdf]

# Supporting Information

Zakhrabekova et al. 10.1073/pnas.1113009109

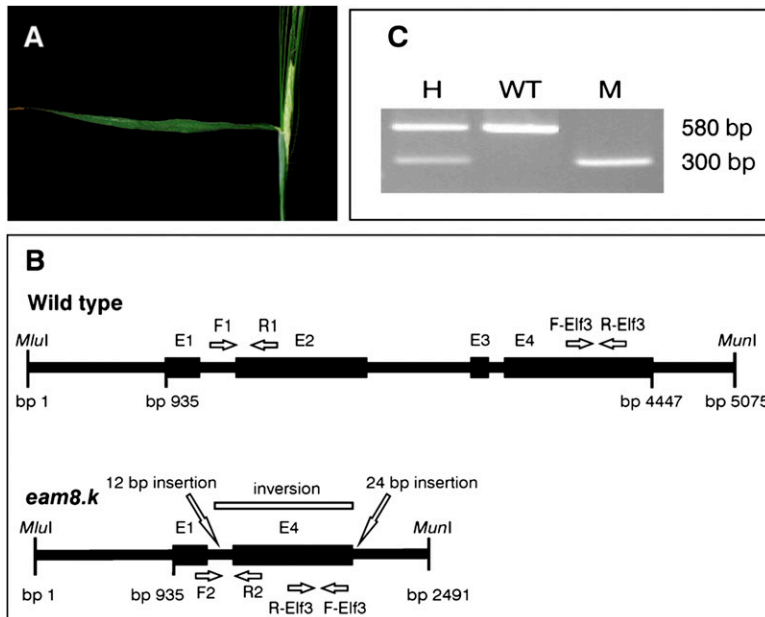

**Fig. S1.** Mapping populations were phenotyped for the day of heading (A) and genotyped, exploring the unique mutation of BW289 (*eam8.k*) (B and C). (A) Barley spike at the day of heading. Fifty percent of the spike should have emerged above the flag leaf. The day of heading was used in phenotyping to approximate the day of flowering. (B) Positioning of primers complementary to the barley *Mat-a/Eam8/Elf3* gene of wild type (Upper) and BW289 (*eam8.k*) (Lower). The primers were used for screening of the mapping population. Primers F1 (GTCTGATTGGATTGGAAAACCTAG) and R1 (TGGGAAATTTGCAGTTGG) allowed specific amplification of the wild-type allele, because F1 and R1 recognize a region that is deleted in *eam8.k*. Similarly, primers F2 (ACAAGCTGCATGGCGATAC) and R2 (TTTCGGTCGATCCAGATG) exploit an inversion in *eam8.k*, which make them specific to this allele. The binding site of primers F-Elf3 and R-Elf3 used for expression analysis of *Elf3* are indicated. (C) DNA fragments separated by agarose gel electrophoresis, illustrating the principle of genotyping. Primer pairs specific for the *eam8.k* mutation (M) or the wild-type (WT) allele amplified a 300- or 580-bp DNA fragment, respectively. Both fragments were obtained simultaneously in heterozygous plants (H).





```

4051 CACTCAGGAG CACCACTCGA GGAGCTCGTG CAACATGAGG AACGAGGCCG
      T H E H H S R S S C N M R N E A V
4101 TGTCCGTCGG CCGCGTCTGG AGGTCCACT CGTCCCAGCG CAGCGAGCTG
      S V G G V W R F H S S R G S E L
4151 CAAGGGAGCA GCGCCGCCAG CCGCCCTTTT GACAGGCAGC AGGGCCAGGG
      Q G S S A A S G P F D R Q Q G Q G
4201 CGAGGCGAGG GGCCATGCAG CCGCCCGGCC TCGGCGGCC CTGCCTACGT
      E A R G H A A A A P A A P L P T S
4251 CGTCGTCCGC CGGGAACGGG AACGGGAACG CGGCCAGCA GCCCCAGGTC
      S S A G N G N G N A A Q Q P Q V
4301 TCCTCGGGCA GTCAGGAGAA CCCGGTGGCG GCGGCAGCGG CGGCCCTGTG
      S S G S Q E N P V A A A A A A R V
4351 GATCCGGGTG GTACCGCACA CCGCACGCAC CGCGTCGGAG TCGGCGGCCG
      I R V V P H T A R T A S E S A A R
4401 GCATCTTTCG GTCGATCCAG ATGGAGAGGC AGCAGAACGG CCCGTGACCG
      I F R S I Q M E R Q Q N G P -
4451 AGCGACCATC GGCATGCGGT GGTGGCCGG CAGAAAGAAA GAAAGGAAGC
4501 TTAGCCAATT AGCGCTTCAG AGTATGCTGT TATTTTGGAG CAGGCAGGCA
4551 GCAAGCAATA GCATTCTTAT ATATAATTTG TCTCTGGCG TCGGTAAGAA
4601 TGGATTTTGG CCGACTGTAA ATATGCAAAG CAAAGCAGGA CTTGTATGAA
4651 TGCCAGAATG CTGGTTGGGC AAAGCAAAGC AGGACTTGTA TCTATCTATC
4701 TTATTTATCT ATGCCAGRAAT GAGAATTGTA ACTGTTACTG TTAGGTGTAT
4751 GTCCTGGGCA AAAAGAAGTG AAACCTGGGA TTGATAGCTC TAATGTATTA
4801 CTTATTATCT ATGTGCAGCC ATGTTTCCTG CTGATATATA AATGGCATGT
4851 TATCTTTTTT TGCCCATTTG TACTGTATC ATTTATTTTT GTACCTGAAC
4901 CTGCTAGATG ATTATTGAGC AGGCAGGAAG TGAGTCACAG TTTTAGATTT
4951 GTGTTTGAAC TTGGATTTTC AAATGCTGAA AGTAGCATAT TGTATTCGAG
5001 AATTTCTTAC AACTTCCAAA CGTAGTTACC ACATTTTGAC TTGTATGAGA
5051 AGTCAGATGT TGACTACACC AATTG

```

Fig. S2. A 5,075-bp MluI–MunI DNA fragment, containing the barley *Elf3* gene that was shown to be identical to the barley *Mat-a* gene. The sequence is that of the barley cultivar Bonus.



|                                          |                                                              |     |
|------------------------------------------|--------------------------------------------------------------|-----|
| Barley                                   | PTAKFPNTDKRYLEGRNPSDTRSRSDPNIIRDKAPANTTTNFLEAEERTSSSF-----   | 259 |
| <i>Arabidopsis</i>                       | -----VAPSSHHSIRFQEVNQTGSKQNVCLATCSKPEVRDQVKANARSGGFV-----    | 202 |
| Wheat                                    | PTAKFPNTDKRYLEGRNASDTRSRSDSPSIIRDKAPANTTTNFLETEERTSSSF-----  | 265 |
| Castor oil plant B                       | AGDKDQKNNISRGPNLRQDARNQSKENLEACVSSRGHSVRSFTSSPSKELM-----     | 225 |
| Poplar B                                 | -----GLNLRPDTSNQSEDNLEVCVSSSDHIAHSHSTNLRTRKNN-----           | 178 |
| Grape vine B                             | ACEKELKQTSNGLSVRQDKRSQGDVNRKDYVSSREYSEKASNLSTKEKID-----      | 220 |
| Ice plant                                | -----HPVFFLCSSSEKQANKMSGDI TSRVV INRDQRNLRAYNASTRSSDI-----   | 203 |
| Castor oil plant A                       | VSEKQKKGPGIIDLKATESTRNQTTEEQRKMSACKDLRERYSPVPSFHDKTADPSCSPS  | 273 |
| Poplar A                                 | TSETQKKKTGTINVKEIDHMRIQIEDNGVFEEACQNSMEKFATVTSIKDKPSVS---SSS | 263 |
| Grape vine A                             | ACGKHQRN-----LNVSHRESIS--ATASSGLLTRDEIFEPS-----              | 233 |
| <i>Lemna</i>                             | -----VADCKTRSFKKSDDRIHEDLSSVTTLQDASSG--QDHHDDNLRSSG-----     | 186 |
| <i>Sorghum</i> B                         | -----AKYSSNGKRHLGIDVSDVSKGR-SGIKDTFVQVRID-LEDEETTPSF-----    | 254 |
| <i>Sorghum</i> A                         | SSAKCYSTVNKHLDRMNEADMRLMNS-PKVKEKAVQVPGK-VEVKEKDS-----       | 248 |
| Maize                                    | SSVECYSTVNKHLDKINEADRRLMNS-PKVKEKAVQVSGKA-VEVKEKSS-----      | 251 |
| Rice A                                   | SSTKCYNTVSKKLERIHVSDVKSRTPLKDKEMEAAQTSKN-VEVEKSSS-----       | 263 |
| Rice B                                   | SPTKCYNTVSKNLERINVS DVKSRGS-QKDKETGPAQTLKN-VEVEHFS-----      | 259 |
|                                          |                                                              |     |
| Barley                                   | -----QFSADKTMGKRDDKGSYSY--DKPSSINVS DKQQRNEGHQARTRNENA       | 306 |
| <i>Arabidopsis</i>                       | -----ISLDVSVTEEIDLEKASSHDRVNDYNASLRQE-----SRNRLYRDGG         | 245 |
| Wheat                                    | -----QSAEKTMGKRDDKGSYSYRVKETSINVS DKQHSRNEGHQARTRNENA        | 314 |
| Castor oil plant B                       | -----IVRPE-DASPSQQLDDPVASSSSSLCENDVCLQOE--ASAALLQQNDSGHDEGV  | 276 |
| Poplar B                                 | -----DIPPEGNASQNYRNNLVSNFTRLHENDTCLQOE--TSAR-LQSNHSEHGHDV    | 229 |
| Grape vine B                             | -----ESMKQNKPSSEDFRQSSANFSLHDTGGCLLQO--NRAG-AQLGEPDHDVDCV    | 271 |
| Ice plant                                | -----LTREKDCGRRKDTSQYQEKRMNLNLEKTDACLQYD--HEDRLAVGTFRGETDS   | 255 |
| Castor oil plant A                       | GKVKRPESLKRAHPSSYQDHRSSVDFLRSLKSGKGLDQEFVTVQDKAVHKEKSWEEYA   | 333 |
| Poplar A                                 | GKISSTKSLKRTYSSSNQYRKNVNVNKLCLPGTNEQLNQLVMPDKVTIGDNLVLEYR    | 323 |
| Grape vine A                             | -----KRARTSLTKENKRNVVVDTRNRELDIHDLSLHOGSMTLPENTDLPNP---SKA   | 281 |
| <i>Lemna</i>                             | -----DAEKSGSS-----                                           | 194 |
| <i>Sorghum</i> B                         | -----QILKDKT-GRDPKVSPPM--DRLKKNVADKQYSEAESYQMRTRNEDA         | 300 |
| <i>Sorghum</i> A                         | -----SIQASEKFKDKYAKLQCMR--NKVSNINRSD---NNCQPTSVNNGKS         | 290 |
| Maize                                    | -----SFQASEKFKDKYAKLQCMR--NKASNIHCD---NNGCQPASVNGNF          | 293 |
| Rice A                                   | -----FHASKDMFESRHAKVYPKM--DKTGIINDSEPHGNSGHQATSRNGGS         | 310 |
| Rice B                                   | -----FEASKDMFGSKHAKVCP---KTGTINDLDEPHLENSHGQATSRNGSS         | 303 |
|                                          |                                                              |     |
| Barley                                   | AESQNAKAGNGPYST---DIACNGA-SNLSEKGLRETGEKRRKSTGHHDVQR-----    | 355 |
| <i>Arabidopsis</i>                       | KTRLKDTDNGAESHLATENHSQEGHGSPEIDINDREYSKRACASLQQINEEAS-----   | 299 |
| Wheat                                    | AESQNAKAGNGPYST---DVACNGA-SNLSEKGLRETGEKRRKSTGHHDVQR-----    | 363 |
| Castor oil plant B                       | PELTRELEKGNQPMSSDHSSTEDLNSPNEPEIDSEHHGDRSVMQVFGNGDKS-----    | 330 |
| Poplar B                                 | PESRRQKEKINIFQPGNDSHLRKCSPNEPEIDSECFGDKTCG-----              | 273 |
| Grape vine B                             | S-VETARDAWNASRVRSSSYGDLGSPSEPDNDGACRGDKTCGTQLQKGNVDNTN-----  | 324 |
| Ice plant                                | EPPLESTHKVMSLRMLHNPPLKGGYNDVDVAVNIEMPRLEEHLER--ENIDRA-----   | 306 |
| Castor oil plant A                       | IGNDKENAAKVTSLCYRLPLRDNRSNCVNIENSRRKNHEDKQNGSLQVGDVERH-----  | 387 |
| Poplar A                                 | VVTGKENPSKVRSELYSRALLQDDNRRNRCGLEKRSKYREDKQSGSLKAGDLERN----- | 377 |
| Grape vine A                             | VGGGVVSTS-----PKPSLLDGHRRSGGLEHELE--EQKESESLQMGSIDRN-----    | 326 |
| <i>Lemna</i>                             | -----GSTEKIDSSGDDAADRMVR-----                                | 213 |
| <i>Sorghum</i> B                         | VKTQNPKNKSVLLSKPYDDREQNGD-SDILKHLRDTGEKRRKS--HHGVEQN-----    | 351 |
| <i>Sorghum</i> A                         | TEAKNPTATRNPSCKPCTDSDSNWNSNLLERSPREVGAKRKR--QHHSGEQN-----    | 342 |
| Maize                                    | TEAKNPTAARNTPSSCKPCTDSDSNRKSNNLLERSPREVGAKRKR--GHHNGEQN----- | 345 |
| Rice A                                   | MKFQNPMPRRNEISSNPSS--ENTDRHYNLPQGGIEETGTRKRLLEQHDAEKSDVSRSL  | 368 |
| Rice B                                   | VKFQNPVRRNTISAKPSGIENTNGHCNLPQGGLEAGTKRRLLEAQDNAEK-----      | 356 |
|                                          |                                                              |     |
| Barley                                   | -----DDSSDSSVESLPELEIS-PDDVVGAIQPKHFWKARRAIVNQQRVFAVQVFE     | 405 |
| <i>Arabidopsis</i>                       | -----DDVSDSMVDSISSIDVS-PDDVVGILGQKRFWARKAIAVQQRVFAVQLFPE     | 350 |
| Wheat                                    | -----DDSSDSSVESLPLEIS-PDDVVGAIQPKHFWKARRAIVNQQRVFAVQVFE      | 413 |
| Castor oil plant B                       | -----DDVSEISMLDSVSALDVS-PDDVVGIIQKHFHWKARRAIVSQQRVFAVQVFE    | 381 |
| Poplar B                                 | -----NDASETSMVDSVSLDIS-PDDVVGIIQKHFHWKARRAIVNQQRVFAVQVFE     | 324 |
| Grape vine B                             | -----DDLSETSMVDSMSGLDIT-PDDVVGIIQKHFHWKARRAIVNQQRVFAVQVFE    | 375 |
| Ice plant                                | -----NDVSETSMVDSVSGEVC-PDDVVGIIGRKHFWKARTIAVQQRVFAVQVFE      | 357 |
| Castor oil plant A                       | -----NDGSETSLVDSLSALEIS-PDDVVRIIGEKQFWKARRAIVNQQRVFAVQVSE    | 438 |
| Poplar A                                 | -----DAAETSMVDSVTALEIT-PDDVVGIIQKQFWKARTIAVQQRVFAVQVFE       | 428 |
| Grape vine A                             | -----CHVSNANMVDSMLGFDIS-PDDVVGIIQKHFWKARRAIVNQQRVFAVQVFE     | 377 |
| <i>Lemna</i>                             | -----DDASERLLVDSREAADAYNPNLVLGLKHFHWKARRAIVSQQRVFAVQVFE      | 265 |
| <i>Sorghum</i> B                         | -----DDLSDSSVECPAGWEIS-PDDVVGAIQPKHFWKARRAIVNQQRVFAVQVFE     | 401 |
| <i>Sorghum</i> A                         | -----DDLSDSSVECPGWEIS-PDEIVAGIIGKHFHWKARRAIVNQQRVFAVQVFE     | 392 |
| Maize                                    | -----DDLSDSSVECPGWEIS-PDEIVAGIIGKHFHWKARRAIVNQQRVFAVQVFE     | 395 |
| Rice A                                   | LEQHDENIDDDVSDSSVECTGWEIS-PDKIVGAIQKHFHWKARRAIVNQQRVFAVQVFE  | 427 |
| Rice B                                   | -----IDDLSDSSVECTAWEIS-PDEIVGAIQKHFHWKARRAIVNQQRVFAVQVFE     | 407 |
| . . . : : **.. : * ** : * * . ** : : * * |                                                              |     |

Fig. S3. (Continued)

```

Barley          LHRLIKVQKLI AASPHLLIEGDPCLG-----SALVTSKKTAAANVEKQLLSAKSKDD 458
Arabidopsis    LHRLIKVQKLI AASPDLLLEIS-FLG----KVSAKSYVKKLLPSEFLVKPPLPHVVK 405
Wheat          LHRLIKVQKLI AASPHLLIEGDPCLG-----SALVTSKKTAAANVEKQLLSAKSKDD 466
Castor oil plant B LHRLIKVQRLI AGSPHLLLEESTYLG-----KPSMKVSPAKKPPSENVVTPPVHVSKRK 435
Poplar B       LHRLIKVQKLI AASPHVLEEEVHLA-----KPPMKGSFCKNLPSECAVTPPVHVAKHK 378
Grape vine B   LHRLIKVQRLI AGSPHLMVDESAYLG-----KPSLKSSPAKKLPLEYVVKPPNMMVKH 429
Ice plant      LHRLIKVQKLI AASPHVLEGAAPVFG-----KTTLKDSAAKFSSEFGVKAFVHTIKQK 411
Castor oil plant A LHRLIKVQKLI AASPHLLKDKFYLG-----KAFKASEAKKVPNSNYAIEQPPPVIKPK 492
Poplar A       LHRLIKVQKLI AASPHLLLEDNLYVG-----RASLKVQKINKVPSKCAMVD----KPK 477
Grape vine A   LHRLIKVQRLI AASPEGQLDNNLYLAEPASSTKLPSESPKLPSESVQQLPSQIADK 437
Lemna         LHRLMNIQKLI AASPHLLLEDASSFHG---SPAAPS---KSQPVDTSVKPI DPTVNT 317
Sorghum B     LHRLIKVQKLI AASPHLLIEGDPCLG-----KSLAASKKK-LAGDVEKQLLSAKN-ND 452
Sorghum A     LHKLIKVQKLI AASPHLLIEGDPVVG-----NALMGKRNKLPKGNLKVQTL SITN--K 443
Maize         LHKLIKVQKLI AASPHLLIEGDPVVG-----NALTGKRNKLPKGNKRVQTL SITN--K 446
Rice A        LHKLVKQKLI AASPHVLES DPCLG-----NALLGSKNKLVEENLKAQPLLVAT--I 478
Rice B        LHKLVKQKLI AASPHVLEIEGDPCLG-----NALLASKKKMAEENLKAQPVLVAT--N 458
**:*:::* : * ** :. . : .

```

```

Barley          DDAQLTLQQVEYSKDNTGEGNQASPSQDNDLVEVRHENQAASNGAVSSNPPAMPAPT DNKQ 518
Arabidopsis    QRGDSEKTDQHMESSAENNVGRLSNQGH-----QQSNYMPFANNPPASPAPNGYCF 458
Wheat          DDAQLTLQQAEYSKDNTGEGNQASPSQGNVVEVRHENQAASNGAVSSNPPAMPAPP DNKQ 526
Castor oil plant B YDPEKLNHNMEYSAENAVGK--FSSVKNGS-----QPSNCGPYTGKPKPVVAADSKM 486
Poplar B       DNSENPNHKMECSAENAVGKTFPASFVKNK-----QPPNFGPHAG-PTTVPMASDTKM 429
Grape vine B   DDYERASHQLECSAENAVGKTHLPSVKNK-----PPSNYGPYIGNPPAPAPT DNKQ 482
Ice plant      DDSRKPTDKTEGTAENAVPK-AAPHSQNAV-----QPAGYPASS---PPVNTDPMK 459
Castor oil plant A DGSQKPHSSTFEAENAVAKLSLAVNNEVSKGLHT--NQSNGYSDSGGHL PAVATNSGF 551
Poplar A       DHSQKQHTSADFAENAVGKLPSTNDETSKEPIS--QRSNY---SGSAPPAPVATTAKP 533
Grape vine A   NGSQKQDSNNEGAVKDAVGNPPFASP-VVDVKIYAA--QQTNRQ-LENQPPVSMATDTQP 494
Lemna         QPADRKEVLAPAEETRGGEVVP-----PALPAGPAMS DCKSG 354
Sorghum B     EVQPTQQQLEHSKENTEANQPSPSQD-DAAGVQHNNQAINGAVSSNPPSPMTPPS DNKQ 511
Sorghum A     DDIQPTLEQPELSKQNTGEGNSHSDGLDNDHHD--QAANETFTSNPPAIPVAPDNKQ 502
Maize         DDIQPTLEQPELSKQNTGEGNLLASHDDGLDNDHNN--QAATNETFTSNPPAMHVAQDNKQ 505
Rice A        DDVEPSLQQPEVSKENTEDSP-PSPHDTGLSGQRD--QAATNGVSKSNRRATPVAS DNKQ 536
Rice B        DDVQPSLQPELSKENSEENP-PSPRDTAPVSGHHD--QTAKIGASKSNLRATPVAS DNKQ 516

```

```

Barley          NNW--CAPPQNWLVPMVSPSEGLVYKPYTGPCPPAGSFLAP-FYASCAPLSLPSTAGE 575
Arabidopsis    PPQ-PPPSGNHQWLIPVMSPEGLIYKPHPGMA----HTGH-YGGYGHMPTPMVM 511
Wheat          NNW--CAPPQNWLVPMVSPSEGLVYKPYTGPCPPAGSILAP-FYASCAPLSLPSTAGE 583
Castor oil plant B APW-CFQHS LGHQWLIPVMSPEGLVYKPYAAP----GFMGS-VCGGCRPPGSPVGN 539
Poplar B       APW-CFHP PPGHQWLIPVMSPEGLVYKPYTAP----GFMGS-GCGGCGPPGPI PLTDN 482
Grape vine B   GPW-CYPQPQHGHQWLIPVMSPEGLVYKPYGP----GFMST-VCGGCGPMSGAPMGS 535
Ice plant      NPW-SYPQPQVHQWLIPVMTPEGLVYKPYAPP---GMVGP-GCGGYPGSGGPTSVGN 513
Castor oil plant A SPW-CFPPP-SNQLVPMVSPSEGLVYKPYTGPCPPAGFMAQ-VYGNCAPVSLDGGHD 608
Poplar A       SPR-CYPPP-GNQLVPMVSPSEGLVYKPYAGCP PVSREMEF-VYSGCGPI LRPHGG 590
Grape vine A   TSW-CFHPSQGNQWLIPVMSPEGLIYKPYAGQCSPTPRLMSP-FYGNYPVNLVTMGGD 552
Lemna         PLP-IQVAGNH--WLFVPMSPTEGLIYK-----FYKPNMVL- 389
Sorghum B     NSW--CIPPPSQWLIPVMSPEGLVYKPYSGHCP PPGSFMAPPFFASC GPVSLPSTAGD 569
Sorghum A     NNW--CMNPPQNWLVPMVSPSEGLVYKPYAGCP PPGNLLTP-FYANCTPLRLPSTP-- 557
Maize         NNW--CMNPPQNWLVPMVSPSEGLVYKPYAGCP PPGNLLTP-FYANCAPSRLPSTP-- 560
Rice A        NNWGVQLQPPQNWLVPMVSPLEGLVYKPYSGPCPPAGSILAP-FYANCTPLSLPSTAGD 595
Rice B        NNCGVQLQPPQNWLVPMVSPSEGLVYKPYSGPCPPAGSILAP-FYANCTPLRLPSTTGD 575
**.*.*.* * *.:***

```

```

Barley          FMNSPYGIPMPHQ--PQHMVGPPAMPMPYFPFVSVPVMN-PVSSSAVEQVSRVAAAR 632
Arabidopsis    QYHPGMGFPFPPGN-----GYFPPYGMPTIMNPYCSSQQQQQPPNEQM 555
Wheat          FMNSPYGIPMPHQ--PQHMVGPPAMPMPYFPFVSVPVMN-PVSSSAVEQVSRVATAR 640
Castor oil plant B FMDPTYGVPASSHHPHQGTMPMPGVPALGHGYFPYGMPI MS-STMPGS AVEQMN----- 592
Poplar B       FMTSAYAIPTSHY-HQIGVSPGAPVGNACFAPYGMFGMN-PAISGAGSGS----- 533
Grape vine B   FINPAYGVSSHH-HQIGVHPGTPIGHYFPYGMVMNHPTISGSAVEQMNRFAG-H 593
Ice plant      MNMNGMGNPHF--QGAVHFG----GGYFPPYMPMMS-PVMSGSAVDQMNQVSGGP 565
Castor oil plant A FINGAYGVQASHQ--NGIGLPSDPLGQNYFPYGMVMT-PSISGLLFGQVSPFNG-P 664
Poplar A       FLNAAYSVSASNH--EEIGILPGNPHFGQTFPFPYGMVMT-PSICDSAVEQIRPRIG-P 646
Grape vine A   FNTTYGIPISLQ--QGIEIVPSNPLGQTFPFPYGMPLVN-PSITSGSAVEQMNLSVG-D 608
Lemna         -----LPPP-----YCVSQPVSGSAVDQ-- 407
Sorghum B     FMNSAYGVAMPHQ--PQHMVGPPAMPMPYFPFVSVPVMN-PAVSASAVEQVSHVAAASQ 626
Sorghum A     -----YGVMPHQ--PQMVPPGAPAMHMNYFPFVSVPVMN-PGTPASAVEQGSAAAAPQ 609
Maize         -----YGVPIPHQ--PQHMVPPGAPAMHMNYFPFVSVPVMN-PGTPASAVEQGSAAAAPQ 612
Rice A        FMNSAYGVAMPHQ--PQHMVGPPAMPMPYFPFVSVPVMN-PTAPAVVEQGRHPSMPQ 652
Rice B        FMNSAYGVPIPHQ--PQHMVGAPPTMPMNYFPFVSVPVMN-PVALASAVEQGRHPSMPQ 632

```

Fig. S3. (Continued)

|                        |                                                              |     |
|------------------------|--------------------------------------------------------------|-----|
| Barley                 | PNTH-EHHSRSCN---MRNEAVSVGGVWRHFHSSRGSELQGSAAASGPFDRQQGQGEARG | 688 |
| <i>Arabidopsis</i>     | NQFGHPGNLQNTQQ-----QQQRSD--NEPAPQQQQQPTKSYPRARKSRQGSTGSSP    | 605 |
| Wheat                  | PNTHVEHHSRSCN---MRNEAVSAGVWRHFHSSRGSELQGSAAASGPFDRQQGQGEARG  | 697 |
| Castor oil plant B     | --YQGAGQLSGGGA-----NIVVQ--HPS--LQLQKSGSIPRVNKPRAK-NTSV       | 636 |
| Poplar B               | --CQTAQPPFGIL-----SSNMP--HQSSCNERQKSEAVLEGMKLRASK-NTSV       | 579 |
| Grape vine B           | GSLSQSGQLSGGGA-----SFMQ--HQNSCNVPTPKR-AIPQGVKPFMSK-DSEF      | 640 |
| Ice plant              | NPFQGMNQPAAGSV-----NQTQ--HQNSCNKQQRRETAAPAMAPLSRREGEL        | 614 |
| Castor oil plant A     | QSK--GNQLSLGDM-----NFTFP--QSSCHISSSMSRVISCCAENFQPSKESV       | 711 |
| Poplar A               | QSK--DNQLAVGDV-----NFIIP--LQSSCNMSNQMSRVISCCVENFQGLKESIE     | 693 |
| Grape vine A           | QSSRPNNHVSVDI-----NATVQSVHYQSLGNMPSQKSGGILGCFGKFAKSSSEL      | 660 |
| <i>Lemna</i>           | -----GSFVSG-----SHASNC--NRPNPRE-----ADLQSSSTAS-              | 436 |
| <i>Sorghum</i> B       | RNGHIEQHTRNCSNASHLRSEAVSAG-VWRVHASRDSELRQSSASS-PFDRQQGEG--RG | 682 |
| <i>Sorghum</i> A       | PQGHMEQQSLISCN-----MSHPSGIWRFLASRDSELPQASSASS-PFDRLEAQGDGSG  | 661 |
| Maize                  | PHGHMDQQSLISCN-----MSHPSGVWRFLASRDSELPQASSATS-PFDRLQVQGDGSA  | 664 |
| Rice A                 | PYGNFEQQSWISCN-----MSHPSGIWRFLASRDSELPQASSASS-PFDRFQCSG--SG  | 702 |
| Rice B                 | PYGNLEQHSRMSCN-----MSHPSGIWRFLASRDSELPQASSASS-PFDRLQCGG--SG  | 682 |
|                        |                                                              |     |
| Barley                 | HAAAAAAPLPTSSSAGNGNGNAQ-----                                 | 713 |
| <i>Arabidopsis</i>     | SGPQGISGSKSF--RPPAAVDEDSNI-----                              | 629 |
| Wheat                  | PAAAAAPALPTSS--AGNGNAQ-----                                  | 719 |
| Castor oil plant B     | RGSTASS-PSER-VQGAGNAQAAETRD-----                             | 661 |
| Poplar B               | QGSTGSS-PSGR-VQGVGTVAADGRA-----                              | 604 |
| Grape vine B           | QGSTASS-PSER-EQQVGTGDTAEGRD-----                             | 665 |
| Ice plant              | QGSTSSSPKRGAGQGTGTSPTTKERDA-----                             | 642 |
| Castor oil plant A     | QGSTASS-PSES-----LKGD-----                                   | 726 |
| Poplar A               | QGSAGS-LSKM-----PKAN-----                                    | 708 |
| Grape vine A           | QVSTAST-PSKR-----AQAD-----                                   | 675 |
| <i>Lemna</i>           | -----                                                        |     |
| <i>Sorghum</i> B       | -----PAPPPPASS--VGNRQAQA-----                                | 699 |
| <i>Sorghum</i> A       | PVSFFPKASVLAQPPQSSGGRDQNHVIRVVPNAQTASVPNAQPQSSGGRDQNHVI      | 721 |
| Maize                  | PLSFPTASAPNVQPPSSGGRD-----RDQNHVI                            | 695 |
| Rice A                 | PVSAPPTVSAQNQP-----                                          | 717 |
| Rice B                 | PVSAPPTASAQNTQP-----                                         | 697 |
|                        |                                                              |     |
| Barley                 | -----QPQVSSGSQENPVAAAAARVIRVVPHT-ARTASESAARIFRSIQ            | 757 |
| <i>Arabidopsis</i>     | -----NNAPEQMTTTTTTRTTVTQTTDRGGVTRVIKVVPHN-AKLASENAARIFQSIQ   | 684 |
| Wheat                  | -----QPQVSSSSQENPVAAAA--RVIRVVPHT-ARTASESAARIFRSIQ           | 761 |
| Castor oil plant B     | -----PLPLFPPTAPIAL--EGATQPLTNQPRGVKVVPHN-RRSATESAARIFQSIQ    | 711 |
| Poplar B               | -----AFPPFPVTPPCP--EGAPQHETDQLSKVIKVVPHN-GRSATESVARIFQSIQ    | 654 |
| Grape vine B           | -----PLPLFPMAPAAIP-AGDPQNGTDQPTRVIRVVPHT-PRSATESAARIFQSIQ    | 716 |
| Ice plant              | -----LPLPLPLFPPTAPVAEKSEGAPP--VEKASRVKVVPHN-PKSTKESAARIFQSIQ | 694 |
| Castor oil plant A     | -----ALPLFPFIEPTAQASDQNGQTD--AQWTRVIKVVPHN-ARSATESAARIFRSIQ  | 776 |
| Poplar A               | -----ALPLFPFMEPTLQASYPNAQTN--EQQARVIRVVPHT-RRSATESAARIFQSIQ  | 758 |
| Grape vine A           | -----ALPLFPVAPKIQESDQLDQIHGNEKQTRAIKVVPHK-HKSASESAARIFRSIQ   | 727 |
| <i>Lemna</i>           | -----AASWPKPGTGATVAASAGESPTKVIKVVMPRN-PKSASESAVIFQSIQ        | 483 |
| <i>Sorghum</i> B       | -----QAQASSGRENPE-----SRVIRVVPHT-ARTASESAARIFQSIQ            | 737 |
| <i>Sorghum</i> A       | RVVPRNAQTASVANAQTPSSGGQDQW-----NHVIRVVPHT-AQTASESAARIFRSIQ   | 774 |
| Maize                  | RVVPRNAQTASVPAKAPQPPSSGGRDQK-----NHVIRVVPHT-AQTASESAARIFRSIQ | 748 |
| Rice A                 | -----QPSYSSRDNQ-----TNVIRVVPHT-SRTASESAARIFRSIQ              | 753 |
| Rice B                 | -----QPSGSRDNQ-----TNVIRVPHNNSQTASESAARIFRSIQ                | 734 |
|                        |                                                              |     |
| Barley                 | MERQONGP---765                                               |     |
| <i>Arabidopsis</i>     | EERKRYDSSKP 695                                              |     |
| Wheat                  | MERQONGP---769                                               |     |
| Castor oil plant B     | EERKQNDT---719                                               |     |
| Poplar B               | EGRKQYDSL--663                                               |     |
| Grape vine B           | DERKQLDST--725                                               |     |
| Ice plant              | AERRQYESKSN 705                                              |     |
| Castor oil plant A     | EERKQYD---783                                                |     |
| Poplar A               | EERKQYD---765                                                |     |
| Grape vine A           | EERNQYD---734                                                |     |
| <i>Lemna</i>           | MERKRFDPL--492                                               |     |
| <i>Sorghum</i> B       | MERKQNDP---745                                               |     |
| <i>Sorghum</i> A       | MERKQNDP---782                                               |     |
| Maize                  | MERNQNDP---756                                               |     |
| Rice A                 | MERQRDD---760                                                |     |
| Rice B                 | MERQDDSD---742                                               |     |
| *.*.*.*.* : : : : : ** |                                                              |     |

**Fig. S3.** Alignment of polypeptides deduced from *Elf3* and *Elf3*-like genes from different plant species. Identical residues are marked with asterisks. Conserved substitutions are marked with colons. Semiconserved substitutions are marked with dots. The amino acid residues R43 and N44 are affected by the point mutations in *mat-a.1067* and *mat-a.45* causing the amino acid substitutions R43H and N44I, respectively. R43 and N44 are located in the most conserved region of ELF3 and are indicated with bold letters and arrows. The NCBI GenInfo Identifier number of each protein in the alignment is: *A. thaliana*, GI:15225220; wheat (*Triticum aestivum*), GI:118767203; *S. bicolor* A, GI:242057743; *S. bicolor* B, GI:242089093; rice (*O. sativa*) A, GI:5803261; rice (*O. sativa*) B, GI:222618691; maize (*Zea mays*), GI:293334705; castor oil plant (*Ricinus communis*) A, GI:255549694; castor oil plant (*R. communis*) B, GI:255550864; grape vine (*Vitis vinifera*) A, GI:225442371; grape vine (*V. vinifera*) B, GI:225429428; ice plant (*Mesembryanthemum crystallinum*), GI:34499887; poplar (*Populus trichocarpa*) A, GI:224070734; poplar (*P. trichocarpa*) B, GI:224092236; *Lemna paucicostata*, GI:63003182.

**Table S1.** Cultivars and pedigree accessions in which cultivar Mari, carrying the *mat-a.8* mutation, has been used in crosses

[Table S1 \(DOC\)](#)



**Table S2. Detailed description of *mat-a*, *eam8*, and *ert-o* mutants**

[Table S2 \(DOC\)](#)
